# Supplementary material
Source: publisher figshare collection journal article supplement (https://frontiersin.figshare.com/ndownloader/files/15565031)
Supplement: Supplementary file [file 15565031]

**Supplementary Table 1 | Neutralization activity (Neut50) of plasma samples against DENV1<sup>a</sup>**

| Exp.           | Immunization | Mouse #1 | Mouse #2 | Mouse #3 | Mouse#4 |
|----------------|--------------|----------|----------|----------|---------|
| 1 <sup>b</sup> | Control mRNA | <100     | <100     | <100     | <100    |
|                | DENV1-NS     | <100     | <100     | nd       | nd      |
| 2 <sup>c</sup> | Control mRNA | <100     | <100     | <100     | <100    |
|                | DENV1-NS     | <100     | <100     | <100     | <100    |
| 3 <sup>d</sup> | DENV1        | 940      | 1000     | 920      | nd      |

<sup>a</sup>: The values in each cell correspond to the dilution of plasma sample giving 50% inhibition of DENV1 infection on Vero cells. <sup>b</sup>: Two groups of 4 and 2 HLA-B\*3501 transgenic mice received a prime boost regimen with 10µg control mRNA and DENV1-NS vaccine, respectively, at 4-week interval and plasma samples were tested individually for neutralization activity against DENV1 infection 4 weeks after the boost. <sup>c</sup>: Two groups of 4 HLA-B\*3501 transgenic mice received a prime boost regimen with 10µg control mRNA and DENV1-NS vaccine, respectively, at 4-week interval and plasma samples were tested for neutralization against DENV1 infection on Vero cells 4 weeks after the boost. <sup>d</sup>: Plasma samples from *ifnar*<sup>-/-</sup> mice obtained 4 weeks after intravenous inoculation with 10<sup>6</sup> pfu DENV1 KDH0026A. nd: not done.
